# Supplementary material
Source: PubMed Central journal article supplement (PMC7403729)
Supplement: EMBR-21-e49956-s001.pdf [file EMBR-21-e49956-s001.pdf]

# **PABPN1L Mediates Cytoplasmic mRNA Decay as a Placeholder during the Maternal-to-Zygotic Transition**

## **APPENDIX**

**Appendix table of contents**

**Appendix Figure S1.**

RT-qPCR results of the indicated transcripts in WT and *Pabpn1*<sup>♀-/-♂+</sup> embryos

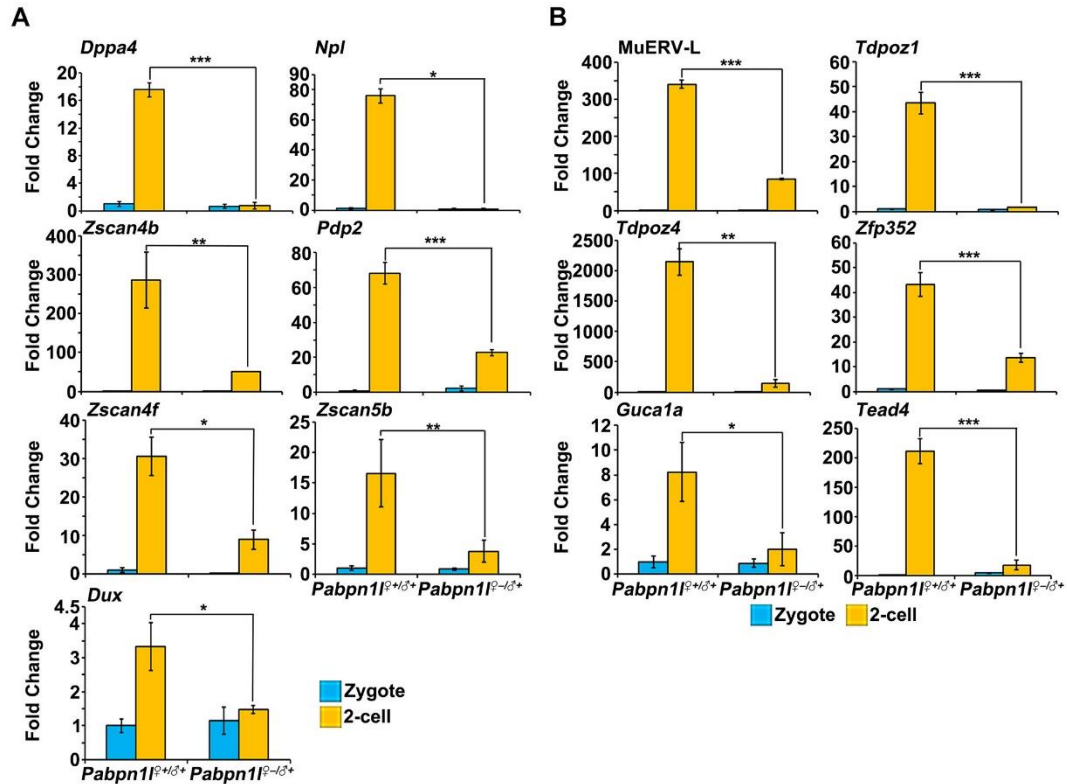

**Appendix Figure S1 RT-qPCR results showing the relative expression levels of the indicated transcripts in WT and *Pabpn1*<sup>♀-/-♂+</sup> embryos.**

**A, B** Total RNA was extracted from 10 embryos in each sample. n = 3 biological replicates. Error bars, S.E.M. \**P* < 0.05, \*\**P* < 0.01, and \*\*\**P* < 0.001 by two-tailed Student's *t*-test.
