# Supplementary material
Source: PubMed Central journal article supplement (PMC7403729)

Fig 1B

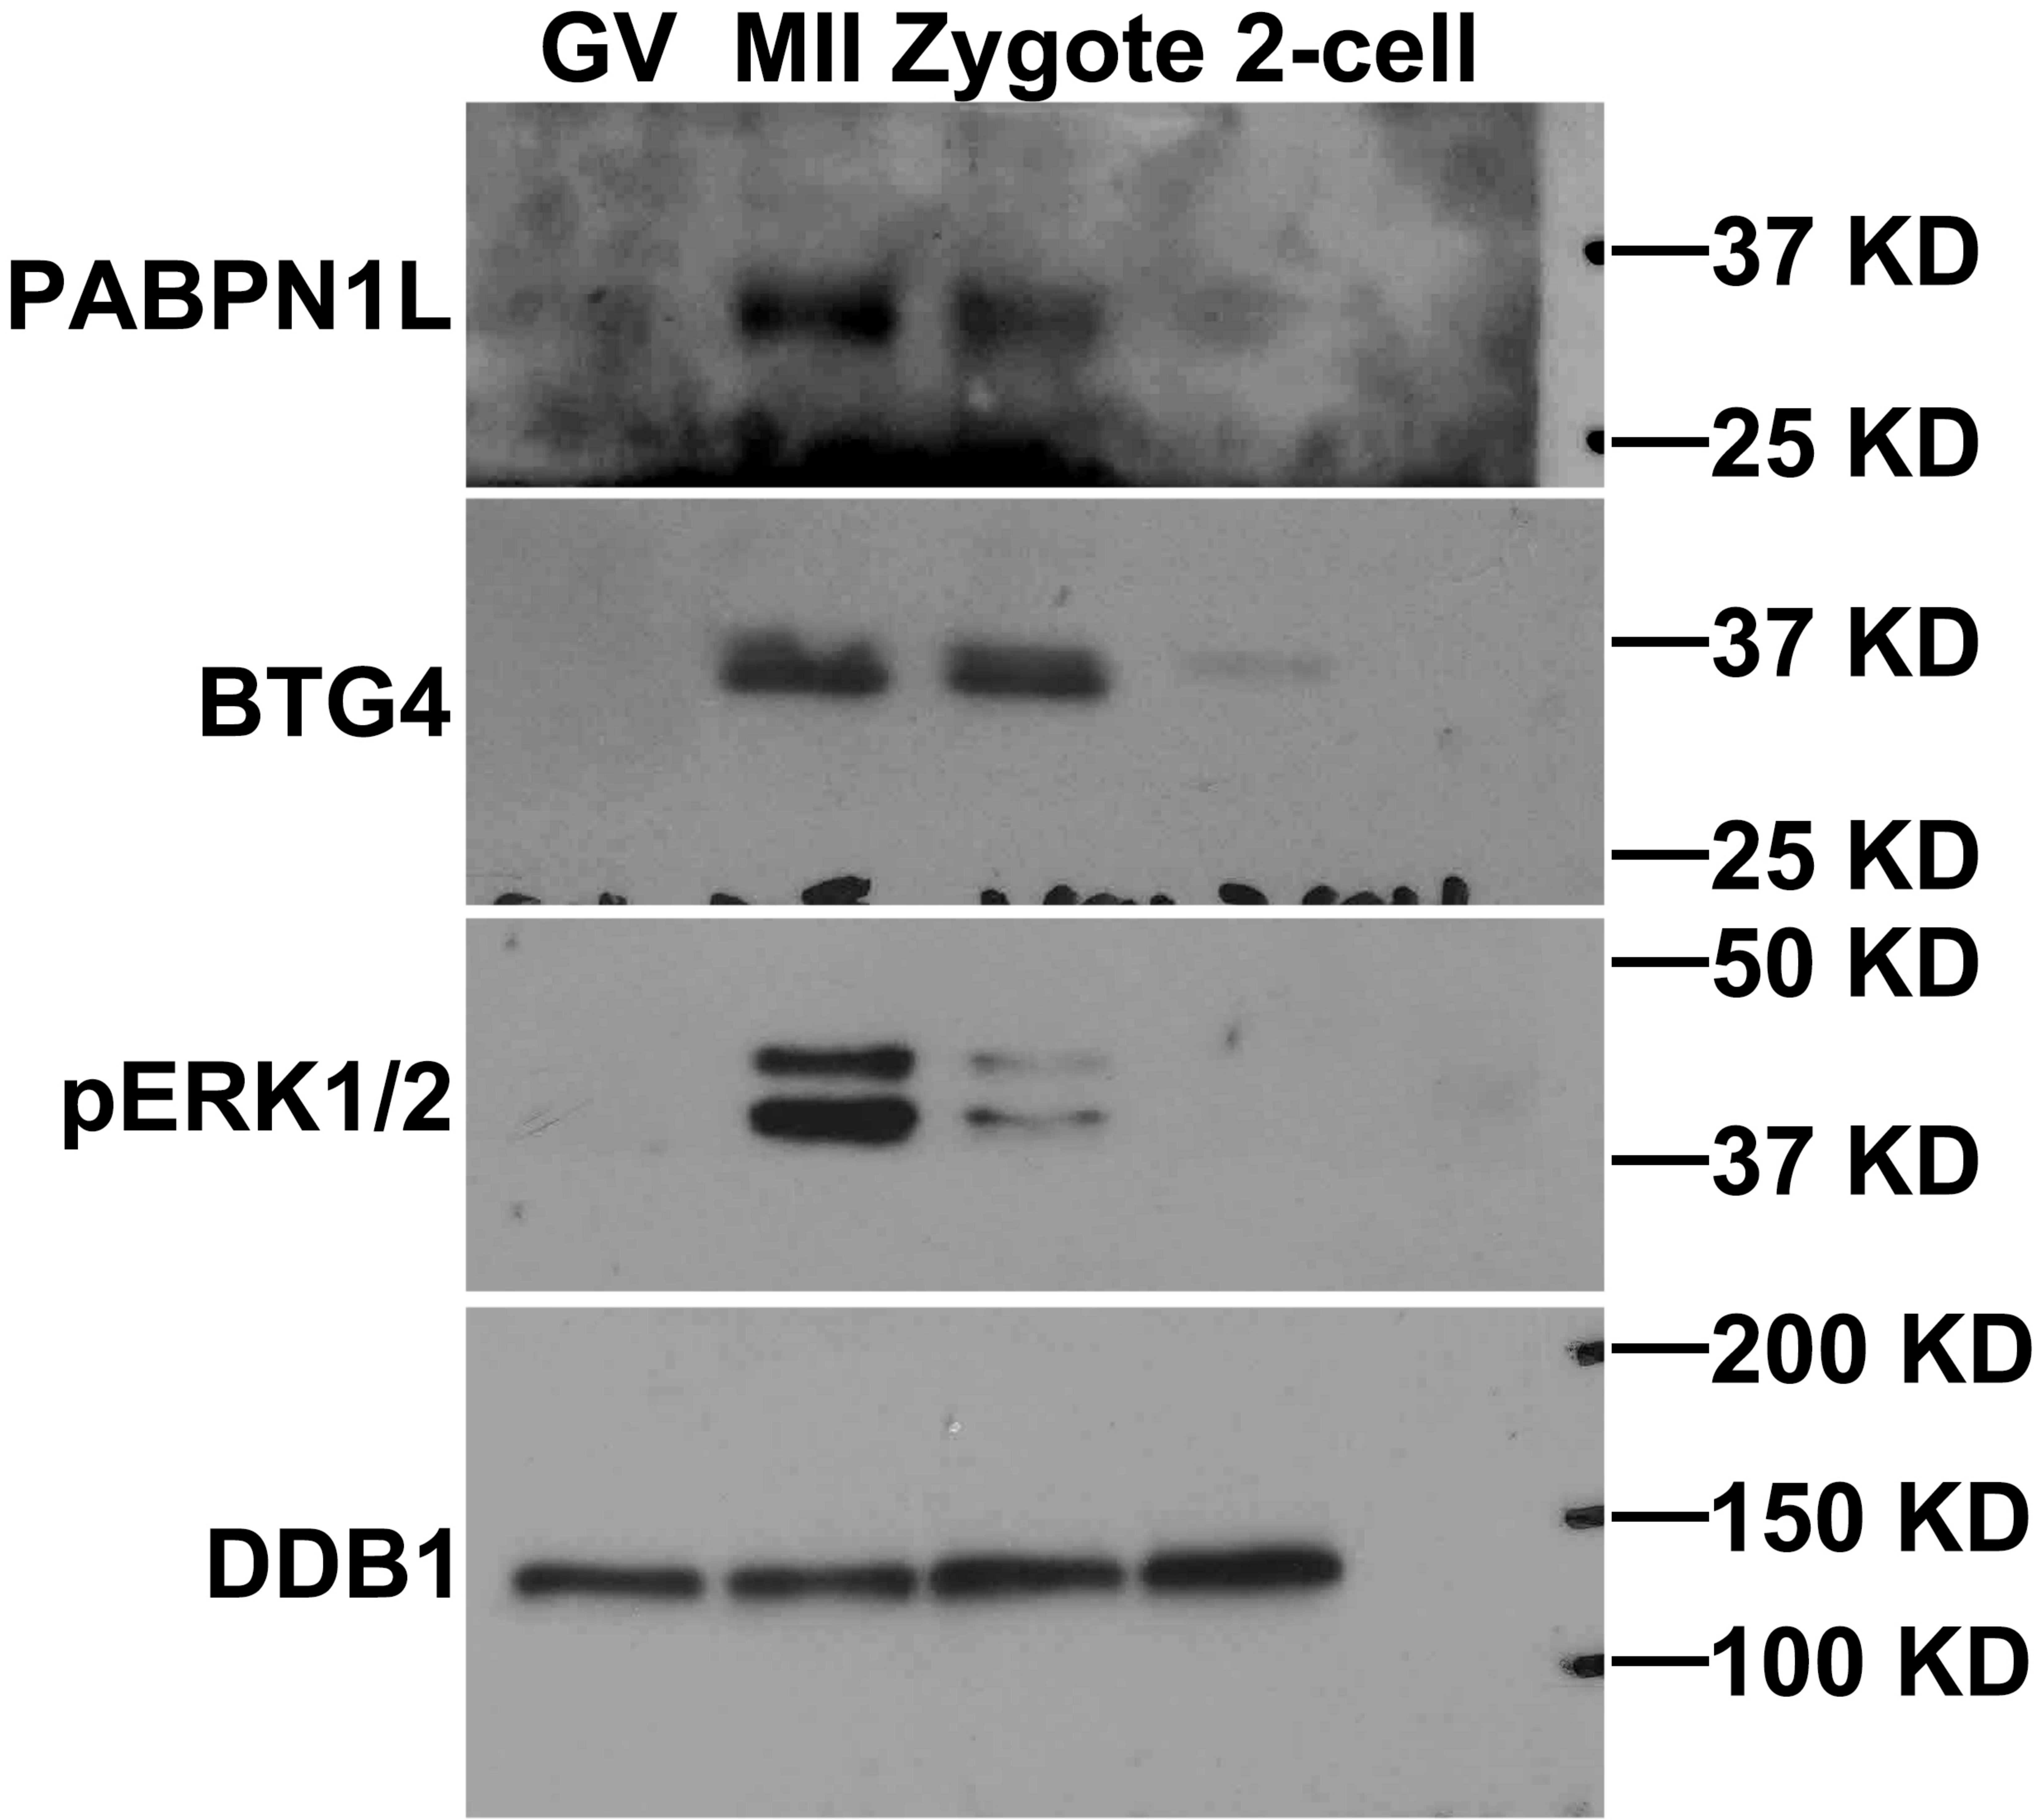

Fig 1C

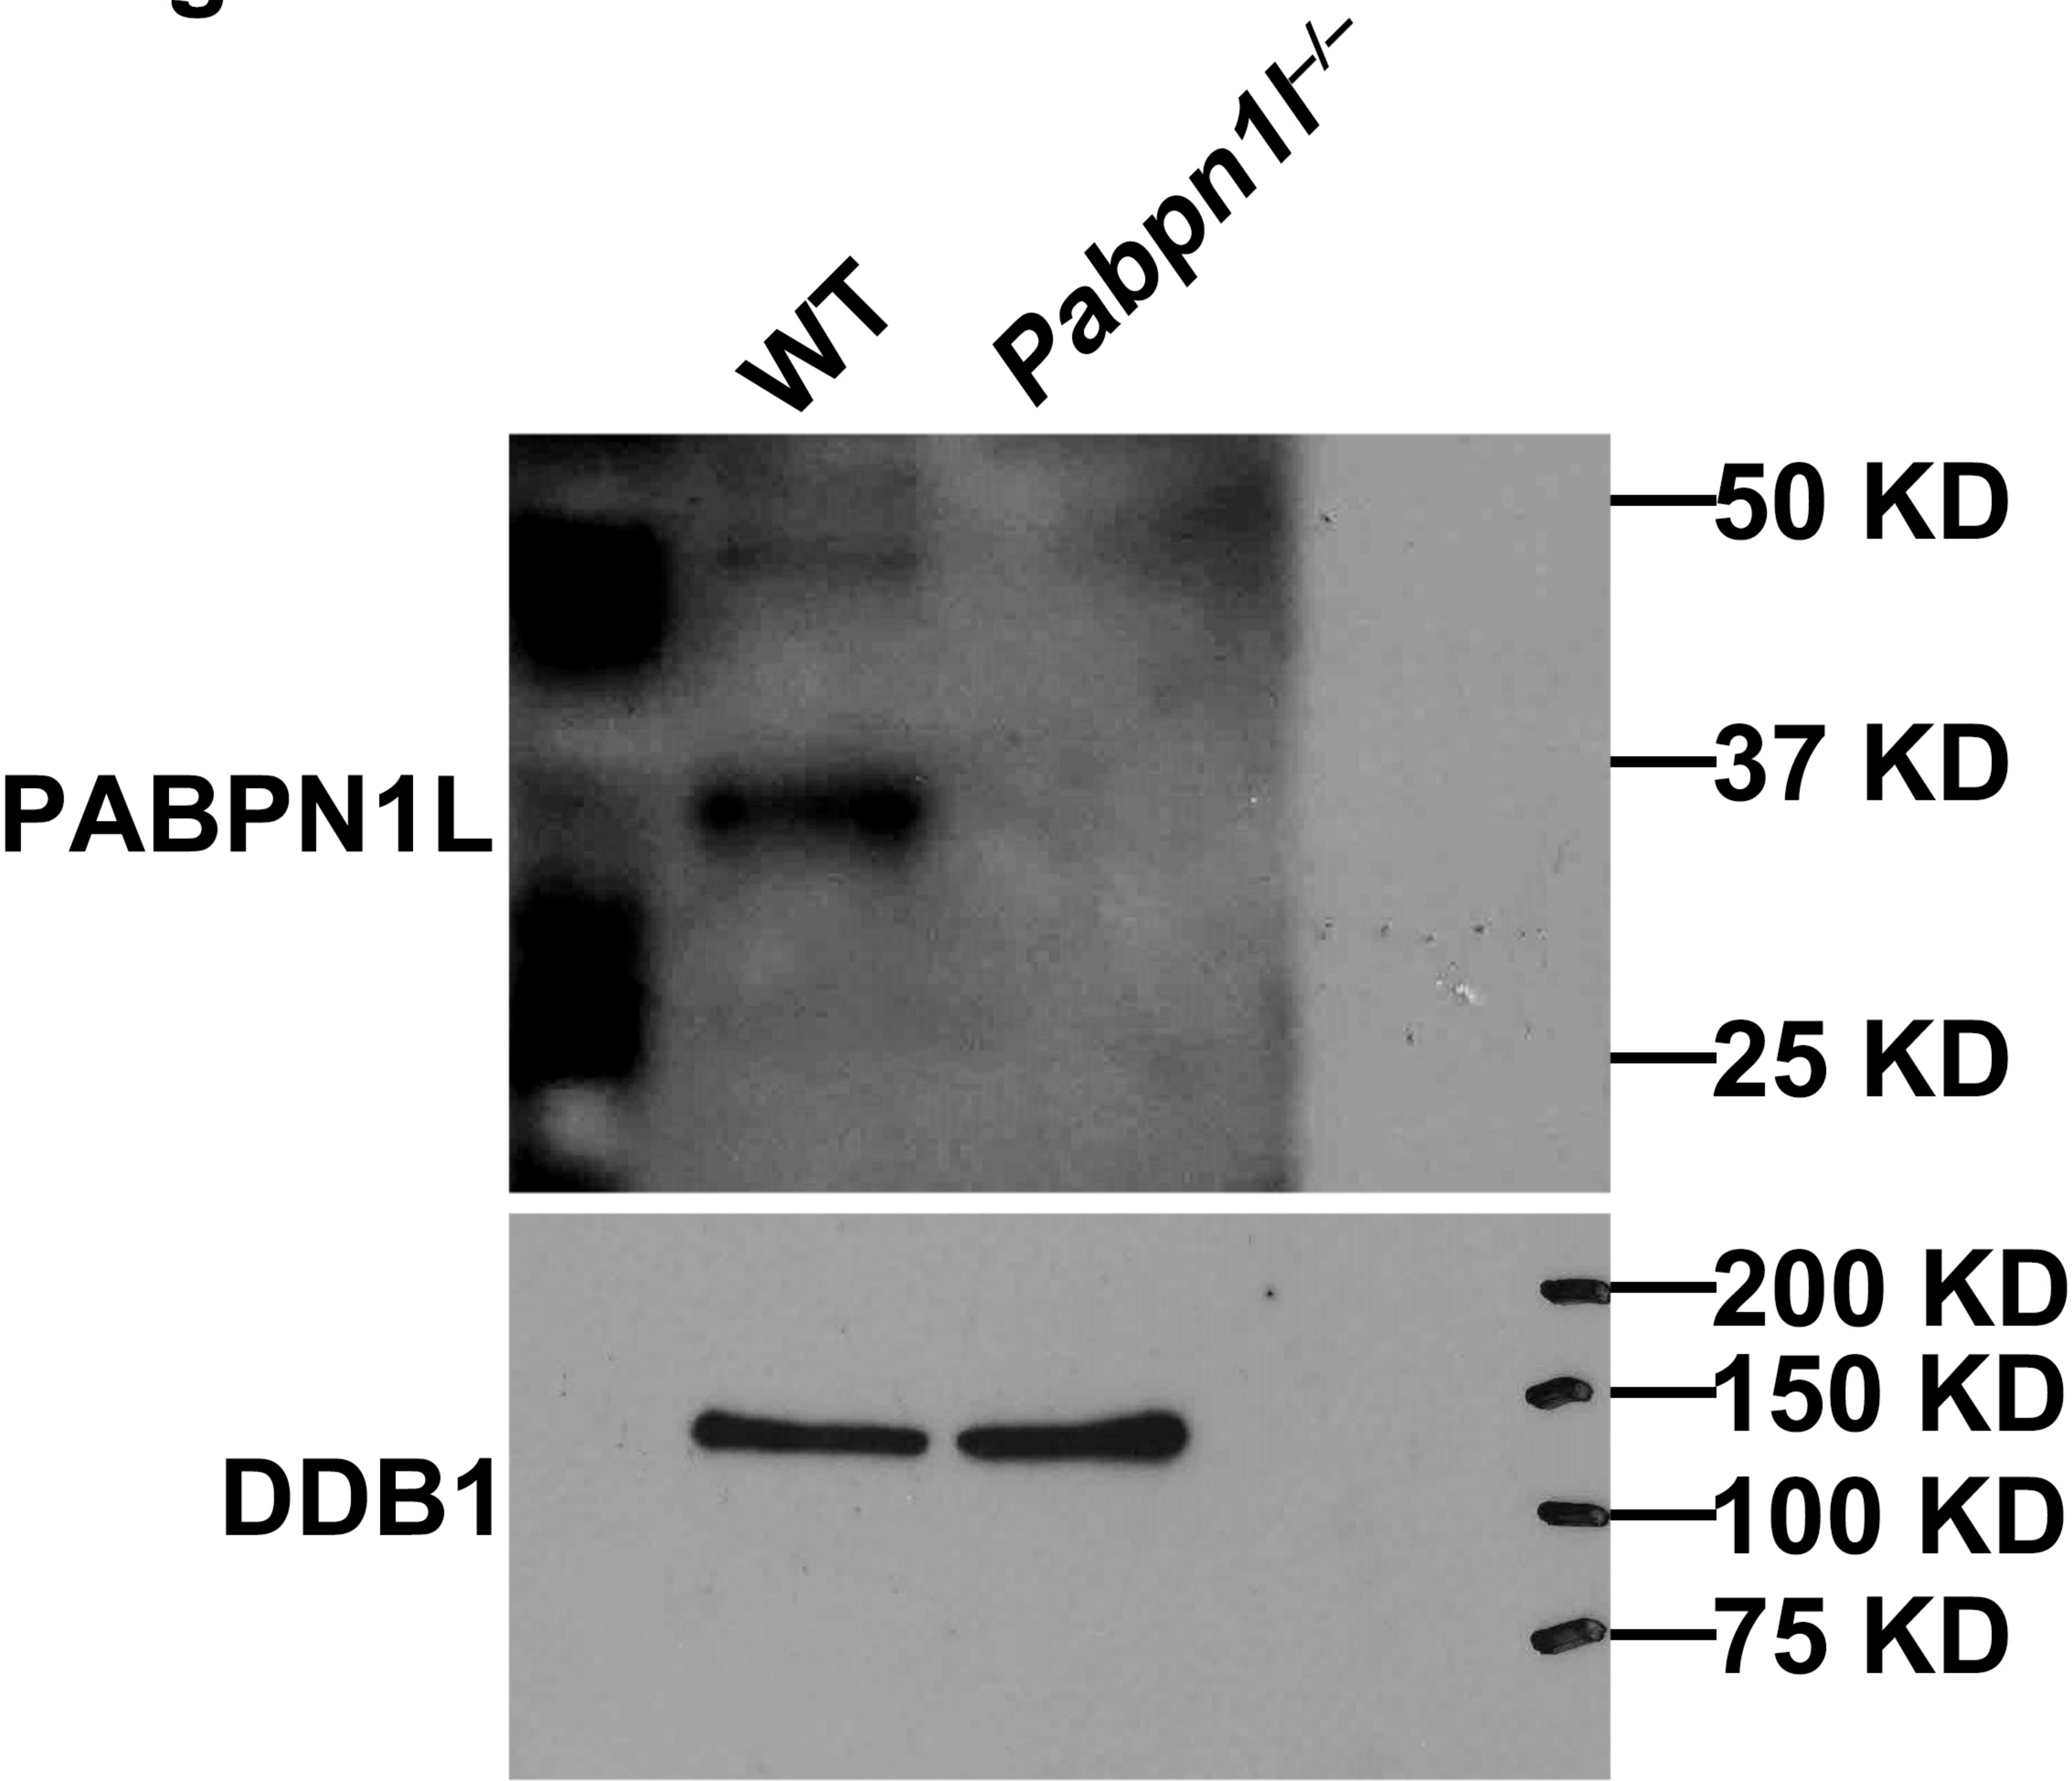

Supplement: EMBR-21-e49956-s009.pdf [file EMBR-21-e49956-s009.pdf]
